# Supplementary material for: Evidence of Antitumor and Antimetastatic Potential of Induced Pluripotent Stem Cell-Based Vaccines in Cancer Immunotherapy
Source: PubMed Central journal article supplement (PMC8702815; doi:10.3389/fmed.2021.729018), 2021-12-10
Supplement: Data_Sheet_1.pdf [file Data_Sheet_1.pdf]

Supplementary Table 1

| Product name                                        | Product Catalog # | Dilution for one test* |
|-----------------------------------------------------|-------------------|------------------------|
| CD44 Antibody, eFluor 450, eBioscience™             | 48-0441-80        | 1/80                   |
| CD24 Antibody, APC, eBioscience™                    | 17-0242-80        | 1/300                  |
| CD45 Antibody, PE-Cyanine7, eBioscience™            | 25-0451-81        | 1/160                  |
| CD8a Antibody, APC-eFluor 780, eBioscience™         | 47-0081-82        | 1/40                   |
| CD25 Antibody, PE, eBioscience™                     | 12-0251-81        | 1/160                  |
| CD279 (PD-1) Antibody, APC, eBioscience™            | 17-9985-82        | 1/40                   |
| MHC Class I (H-2Kd/H-2Dd), eFluor 450, eBioscience™ | 48-5998-82        | 1/20                   |
| CD3e Antibody, FITC, eBioscience™                   | 11-0031-82        | 1/100                  |
| CD24 Antibody, VioBlue®, Miltenyi Biotec            | 130-102-734       | 1/10                   |
| CD11b Antibody, VioBlue®, Miltenyi Biotec           | 130-113-800       | 1/50                   |
| Gr-1 Antibody, APC, Miltenyi Biotec                 | 130-102-385       | 1/10                   |
| CD44 Antibody, APC-Vio® 770, Miltenyi Biotec        | 130-102-326       | 1/10                   |
| CD4 Antibody, PE-Vio®770, Miltenyi Biotec           | 130-124-712       | 1/50                   |
| Ly-6C Antibody, APC-eFluor 780, eBioscience™        | 47-5932-82        | 1/40                   |
| CXCR5 Antibody, APC, eBioscience™                   | 17-7185-82        | 1/40                   |
| CD22 Antibody, PE-Cyanine 5, Invitrogen             | MA5-28653         | 1/50                   |
| CD62L Antibody, FITC, Miltenyi Biotec               | 130-112-646       | 1/50                   |
| Arginase 1/ARG1 Antibody, PE, R&D                   | IC5868P           | 1/10                   |
| CD197(CCR7)Antibody, PerCP-Cy™5.5, BD Pharmingen™   | 560812            | 1/10                   |
| CD127 Antibody (A7R34) PE, eBioscience™             | 1271-81           | 1/80                   |

\*dilution for one test =  $\frac{\text{volume of antibody } (\mu\text{l}) \text{ staining up to } 10^6 \text{ cells}}{100 \mu\text{l (buffer volume)}}$

100  $\mu\text{l}$  (buffer volume)
