# Supplementary material for: Evidence of Antitumor and Antimetastatic Potential of Induced Pluripotent Stem Cell-Based Vaccines in Cancer Immunotherapy
Source: PubMed Central journal article supplement (PMC8702815; doi:10.3389/fmed.2021.729018), 2021-12-10
Supplement: Data_Sheet_2.pdf [file Data_Sheet_2.pdf]

**Supplementary Table 2 : genes found up regulated in 4T1-transplant samples as compared to 4T1-*in vitro***

| gene          | logFC   | AveExpr  | t        | P.Value     | adj.P.Val   | B        |
|---------------|---------|----------|----------|-------------|-------------|----------|
| H2-Ea-ps      | 3.15795 | 7.23913  | 19.37328 | 1.60302E-13 | 4.02394E-10 | 21.08555 |
| Eno1          | 2.71495 | 11.54169 | 18.72646 | 2.87708E-13 | 4.97076E-10 | 20.53706 |
| Dlx1          | 2.91217 | 5.84354  | 17.63809 | 8.03301E-13 | 1.07946E-09 | 19.56538 |
| Lsm14a        | 3.07174 | 8.72571  | 16.61478 | 2.22454E-12 | 2.44578E-09 | 18.59129 |
| Ppp1r16b      | 2.24850 | 4.98073  | 16.48806 | 2.53333E-12 | 2.55317E-09 | 18.46630 |
| Ccr7          | 2.80694 | 5.62976  | 16.40058 | 2.77257E-12 | 2.57934E-09 | 18.37945 |
| Cpz           | 2.45889 | 5.96792  | 15.75027 | 5.49715E-12 | 3.69347E-09 | 17.71840 |
| Tfec          | 3.23459 | 4.98628  | 15.69894 | 5.80840E-12 | 3.69720E-09 | 17.66505 |
| B3gnt4        | 2.45081 | 4.89424  | 15.26231 | 9.33895E-12 | 4.55412E-09 | 17.20397 |
| Dtd2          | 2.78285 | 6.79523  | 15.13460 | 1.07544E-11 | 4.95328E-09 | 17.06661 |
| Klk1b5        | 2.50101 | 3.91951  | 14.51149 | 2.17346E-11 | 8.38664E-09 | 16.37964 |
| Plcg1         | 2.87666 | 7.94580  | 14.11378 | 3.45209E-11 | 1.19164E-08 | 15.92602 |
| Egfl8         | 3.06182 | 6.77746  | 14.06293 | 3.66535E-11 | 1.19164E-08 | 15.86714 |
| H2-Q5         | 4.20586 | 7.45093  | 14.04491 | 3.74419E-11 | 1.19164E-08 | 15.84624 |
| Rps6kc1       | 2.47854 | 6.17354  | 13.98935 | 3.99877E-11 | 1.21905E-08 | 15.78159 |
| Rasgrp4       | 2.17516 | 5.50347  | 13.97028 | 4.09028E-11 | 1.21905E-08 | 15.75935 |
| Sla2          | 2.94408 | 6.56704  | 13.94132 | 4.23350E-11 | 1.21905E-08 | 15.72551 |
| Gas8          | 2.56629 | 7.13002  | 13.87716 | 4.56983E-11 | 1.24193E-08 | 15.65032 |
| Tnfrsf14      | 2.55293 | 6.60905  | 13.87162 | 4.60016E-11 | 1.24193E-08 | 15.64381 |
| Cdon          | 2.52881 | 7.22250  | 13.84291 | 4.76081E-11 | 1.24720E-08 | 15.61003 |
| Plxna1        | 2.67608 | 7.81644  | 13.59757 | 6.39893E-11 | 1.49187E-08 | 15.31876 |
| Polh          | 2.89621 | 6.89254  | 13.59557 | 6.41452E-11 | 1.49187E-08 | 15.31636 |
| Col9a2        | 2.91238 | 5.85019  | 13.50846 | 7.13235E-11 | 1.54033E-08 | 15.21174 |
| Mlc1          | 2.05313 | 4.11019  | 13.44906 | 7.66986E-11 | 1.59930E-08 | 15.14004 |
| Pip4k2b       | 3.77113 | 7.34185  | 13.42227 | 7.92606E-11 | 1.61388E-08 | 15.10761 |
| Pglyrp1       | 2.33150 | 5.18249  | 13.40058 | 8.14013E-11 | 1.61388E-08 | 15.08130 |
| Gzmg          | 2.52424 | 4.11136  | 13.27812 | 9.46779E-11 | 1.73490E-08 | 14.93205 |
| Farp2         | 3.05440 | 7.06315  | 13.23667 | 9.96726E-11 | 1.77271E-08 | 14.88123 |
| Krtap5-5      | 2.32828 | 4.93314  | 13.10957 | 1.16786E-10 | 1.93480E-08 | 14.72453 |
| 3110070M22Rik | 2.18151 | 5.15737  | 12.90081 | 1.51918E-10 | 2.41749E-08 | 14.46410 |
| Vav1          | 2.24475 | 5.29367  | 12.78302 | 1.76491E-10 | 2.73651E-08 | 14.31548 |
| Hlx           | 2.08700 | 6.89985  | 12.66883 | 2.04322E-10 | 2.97719E-08 | 14.17020 |
| Kirrel        | 3.81504 | 7.35539  | 12.62375 | 2.16544E-10 | 3.06935E-08 | 14.11253 |
| Il10ra        | 2.27528 | 5.52758  | 12.61559 | 2.18837E-10 | 3.06935E-08 | 14.10207 |
| Pik3ap1       | 2.36424 | 5.65557  | 12.59875 | 2.23652E-10 | 3.06935E-08 | 14.08046 |
| a             | 2.16155 | 5.60147  | 12.54340 | 2.40270E-10 | 3.15850E-08 | 14.00928 |
| Mpp4          | 2.63015 | 4.72559  | 12.46989 | 2.64373E-10 | 3.36560E-08 | 13.91429 |
| Srgap1        | 2.17109 | 4.66251  | 12.39020 | 2.93391E-10 | 3.58411E-08 | 13.81075 |
| Scn5a         | 2.17967 | 6.53059  | 12.37643 | 2.98733E-10 | 3.61288E-08 | 13.79281 |
| Atxn1         | 2.85736 | 6.56655  | 12.34188 | 3.12595E-10 | 3.70640E-08 | 13.74770 |
| Maml2         | 3.09713 | 6.03512  | 12.32788 | 3.18406E-10 | 3.73022E-08 | 13.72938 |

|          |         |          |          |             |             |          |
|----------|---------|----------|----------|-------------|-------------|----------|
| Fbxl15   | 2.46870 | 7.21275  | 12.32224 | 3.20773E-10 | 3.73022E-08 | 13.72201 |
| Prcc     | 2.98493 | 7.60643  | 12.23328 | 3.60738E-10 | 4.11581E-08 | 13.60516 |
| Prf1     | 2.76297 | 6.91167  | 12.05840 | 4.55298E-10 | 5.05172E-08 | 13.37330 |
| Kcnj2    | 2.53718 | 3.97130  | 12.01003 | 4.85807E-10 | 5.34123E-08 | 13.30865 |
| Mall     | 3.25681 | 6.61842  | 11.99170 | 4.97924E-10 | 5.42513E-08 | 13.28409 |
| Mt3      | 2.16491 | 5.16258  | 11.88598 | 5.74278E-10 | 6.09238E-08 | 13.14181 |
| Ccl3     | 2.54690 | 5.21462  | 11.75643 | 6.84911E-10 | 6.90702E-08 | 12.96598 |
| Fam167b  | 2.44953 | 5.08227  | 11.65638 | 7.85557E-10 | 7.60042E-08 | 12.82905 |
| Olfml3   | 2.10886 | 6.92265  | 11.64474 | 7.98239E-10 | 7.66182E-08 | 12.81305 |
| Ikbke    | 2.83495 | 6.62363  | 11.62881 | 8.15938E-10 | 7.70934E-08 | 12.79114 |
| Pglyrp2  | 2.45045 | 4.92581  | 11.59211 | 8.58302E-10 | 7.92390E-08 | 12.74056 |
| Krtap4-2 | 2.26907 | 6.40990  | 11.58444 | 8.67440E-10 | 7.94759E-08 | 12.72997 |
| Lat2     | 2.35223 | 5.40001  | 11.50077 | 9.74052E-10 | 8.45308E-08 | 12.61408 |
| Pou3f3   | 2.10591 | 4.32593  | 11.49235 | 9.85517E-10 | 8.45308E-08 | 12.60238 |
| Zfp865   | 2.52001 | 5.99514  | 11.45876 | 1.03268E-09 | 8.79527E-08 | 12.55563 |
| Mfap4    | 2.48530 | 5.48291  | 11.38362 | 1.14697E-09 | 9.56655E-08 | 12.45062 |
| Dennd1b  | 2.66653 | 6.96942  | 11.34597 | 1.20914E-09 | 1.00160E-07 | 12.39779 |
| Gatm     | 2.36132 | 6.76143  | 11.28359 | 1.32007E-09 | 1.07871E-07 | 12.30993 |
| Tmem59   | 2.39471 | 8.65622  | 11.24330 | 1.39732E-09 | 1.13418E-07 | 12.25297 |
| Spp1     | 3.23903 | 11.43275 | 11.18810 | 1.51095E-09 | 1.20388E-07 | 12.17467 |
| Zdhhc1   | 2.31291 | 7.33319  | 11.18245 | 1.52312E-09 | 1.20396E-07 | 12.16663 |
| Crabp1   | 2.76487 | 6.68717  | 11.17575 | 1.53769E-09 | 1.20759E-07 | 12.15709 |
| Gipc3    | 2.10537 | 5.70311  | 11.13152 | 1.63752E-09 | 1.23776E-07 | 12.09407 |
| Cmklr1   | 3.16243 | 5.61387  | 11.12125 | 1.66167E-09 | 1.24821E-07 | 12.07940 |
| Chmp4c   | 3.29197 | 6.09680  | 11.08776 | 1.74302E-09 | 1.28537E-07 | 12.03149 |
| Ankrd27  | 2.19429 | 7.52373  | 11.08062 | 1.76090E-09 | 1.29069E-07 | 12.02126 |
| Spock3   | 2.37772 | 3.35600  | 11.05980 | 1.81412E-09 | 1.29557E-07 | 11.99141 |
| Usp42    | 2.21663 | 7.64128  | 11.00710 | 1.95658E-09 | 1.36779E-07 | 11.91562 |
| Pdk3     | 2.70347 | 7.65561  | 10.94900 | 2.12726E-09 | 1.44663E-07 | 11.83174 |
| Bard1    | 2.39200 | 6.93920  | 10.94731 | 2.13244E-09 | 1.44663E-07 | 11.82929 |
| Tnnt2    | 3.50343 | 8.78599  | 10.82187 | 2.55748E-09 | 1.63652E-07 | 11.64691 |
| Thap2    | 2.32926 | 6.35892  | 10.81689 | 2.57608E-09 | 1.63975E-07 | 11.63964 |
| Igsf6    | 2.36439 | 5.58132  | 10.80849 | 2.60777E-09 | 1.64853E-07 | 11.62736 |
| Cdr2l    | 2.06543 | 6.25393  | 10.78013 | 2.71786E-09 | 1.70310E-07 | 11.58585 |
| Mybl1    | 3.11526 | 5.96010  | 10.77377 | 2.74321E-09 | 1.71012E-07 | 11.57653 |
| Fgf8     | 2.43848 | 4.71359  | 10.76575 | 2.77552E-09 | 1.72139E-07 | 11.56477 |
| Cit      | 2.31206 | 7.19638  | 10.70829 | 3.01906E-09 | 1.84280E-07 | 11.48031 |
| Stra6    | 3.74145 | 6.94526  | 10.66220 | 3.23057E-09 | 1.92465E-07 | 11.41229 |
| Col12a1  | 3.03910 | 6.88634  | 10.61986 | 3.43854E-09 | 2.02465E-07 | 11.34961 |
| Fhl3     | 2.74349 | 7.74697  | 10.60217 | 3.52954E-09 | 2.05222E-07 | 11.32336 |
| Ammecr1  | 2.71633 | 7.16867  | 10.59542 | 3.56491E-09 | 2.06287E-07 | 11.31334 |
| Lypd3    | 2.61587 | 7.06339  | 10.56570 | 3.72524E-09 | 2.14538E-07 | 11.26912 |
| Tssk6    | 2.04415 | 5.56189  | 10.55282 | 3.79698E-09 | 2.16791E-07 | 11.24995 |
| Papln    | 2.46176 | 5.47610  | 10.52655 | 3.94793E-09 | 2.22076E-07 | 11.21076 |
| Cdx1     | 2.26472 | 5.11947  | 10.40951 | 4.70095E-09 | 2.48267E-07 | 11.03521 |

|               |         |          |          |             |             |          |
|---------------|---------|----------|----------|-------------|-------------|----------|
| Irg1          | 2.66979 | 5.45868  | 10.35825 | 5.07672E-09 | 2.65791E-07 | 10.95784 |
| C1qtnf3       | 2.15985 | 4.90882  | 10.34042 | 5.21468E-09 | 2.69514E-07 | 10.93086 |
| Mcpt1         | 2.15805 | 4.53349  | 10.33084 | 5.29041E-09 | 2.71436E-07 | 10.91635 |
| Bcl7a         | 2.24739 | 7.16311  | 10.30973 | 5.46148E-09 | 2.76063E-07 | 10.88433 |
| Itk           | 2.07315 | 4.59638  | 10.30218 | 5.52400E-09 | 2.76063E-07 | 10.87287 |
| Pcdhb15       | 2.28633 | 4.72930  | 10.26855 | 5.81187E-09 | 2.84770E-07 | 10.82174 |
| Rnf219        | 2.73773 | 6.48236  | 10.21357 | 6.31688E-09 | 3.04368E-07 | 10.73786 |
| Itga2         | 2.23428 | 9.26892  | 10.19322 | 6.51530E-09 | 3.10220E-07 | 10.70672 |
| Stk11ip       | 2.11958 | 6.17146  | 10.15820 | 6.87211E-09 | 3.22753E-07 | 10.65302 |
| Ppard         | 3.62903 | 7.92393  | 10.09785 | 7.53573E-09 | 3.44468E-07 | 10.56017 |
| Ptk7          | 2.42804 | 7.52839  | 10.09572 | 7.56037E-09 | 3.44468E-07 | 10.55688 |
| Serpib1a      | 2.07561 | 5.03589  | 10.07857 | 7.76171E-09 | 3.49086E-07 | 10.53040 |
| P2ry2         | 2.75998 | 6.17790  | 10.05789 | 8.01183E-09 | 3.54927E-07 | 10.49845 |
| Cdc27         | 2.14309 | 9.54029  | 10.03242 | 8.33169E-09 | 3.65085E-07 | 10.45900 |
| Slc25a24      | 2.02126 | 8.73484  | 9.99379  | 8.84237E-09 | 3.80509E-07 | 10.39905 |
| Akt3          | 2.67527 | 8.57326  | 9.98158  | 9.01048E-09 | 3.82584E-07 | 10.38007 |
| Mad11l        | 2.20222 | 7.23014  | 9.96172  | 9.29125E-09 | 3.87477E-07 | 10.34914 |
| Zfp369        | 2.59562 | 6.66613  | 9.90548  | 1.01369E-08 | 4.07514E-07 | 10.26133 |
| Itga4         | 2.06227 | 5.68196  | 9.89610  | 1.02856E-08 | 4.10541E-07 | 10.24664 |
| Kif21b        | 2.75905 | 6.23320  | 9.87380  | 1.06483E-08 | 4.22233E-07 | 10.21169 |
| Brinp1        | 2.08050 | 3.70576  | 9.86499  | 1.07952E-08 | 4.25269E-07 | 10.19787 |
| Cpa1          | 2.00733 | 5.22213  | 9.85370  | 1.09868E-08 | 4.30015E-07 | 10.18013 |
| Dpysl2        | 2.61013 | 9.36641  | 9.83257  | 1.13547E-08 | 4.38736E-07 | 10.14691 |
| Gpa33         | 3.07475 | 9.07092  | 9.80285  | 1.18941E-08 | 4.53777E-07 | 10.10010 |
| Ifi44l        | 2.17412 | 5.11704  | 9.77301  | 1.24629E-08 | 4.72497E-07 | 10.05298 |
| Abhd2         | 2.72951 | 9.33211  | 9.72633  | 1.34100E-08 | 5.03667E-07 | 9.97908  |
| Pask          | 2.34486 | 6.18843  | 9.70510  | 1.38657E-08 | 5.14390E-07 | 9.94537  |
| Ly9           | 2.78092 | 5.48761  | 9.66848  | 1.46897E-08 | 5.33123E-07 | 9.88710  |
| Gzmc          | 2.11817 | 4.44670  | 9.62007  | 1.58583E-08 | 5.65323E-07 | 9.80983  |
| Pla2g5        | 2.35270 | 4.96407  | 9.61609  | 1.59587E-08 | 5.65323E-07 | 9.80347  |
| Cep290        | 2.22880 | 6.30803  | 9.58084  | 1.68765E-08 | 5.93326E-07 | 9.74702  |
| Nuf2          | 2.33474 | 7.97119  | 9.56448  | 1.73211E-08 | 6.03692E-07 | 9.72076  |
| Chtf18        | 2.49171 | 6.41142  | 9.50163  | 1.91464E-08 | 6.54114E-07 | 9.61959  |
| 6820431F20Rik | 2.06532 | 10.46377 | 9.49318  | 1.94066E-08 | 6.61135E-07 | 9.60595  |
| Cacnb2        | 2.20476 | 4.34962  | 9.48860  | 1.95494E-08 | 6.62955E-07 | 9.59855  |
| Dusp9         | 2.99660 | 7.12695  | 9.47766  | 1.98944E-08 | 6.68381E-07 | 9.58088  |
| Ucn           | 2.18053 | 5.64106  | 9.47763  | 1.98956E-08 | 6.68381E-07 | 9.58082  |
| Gcnt1         | 2.57143 | 5.48484  | 9.46992  | 2.01424E-08 | 6.72934E-07 | 9.56836  |
| Igfbp3        | 2.01025 | 7.03139  | 9.46812  | 2.02006E-08 | 6.73019E-07 | 9.56545  |
| Plk3          | 2.64140 | 6.94037  | 9.40301  | 2.24263E-08 | 7.13746E-07 | 9.45986  |
| Prr5          | 2.36473 | 6.41431  | 9.39964  | 2.25483E-08 | 7.15699E-07 | 9.45438  |
| Myo1f         | 2.11304 | 6.03681  | 9.38917  | 2.29315E-08 | 7.20347E-07 | 9.43735  |
| Zscan2        | 2.76856 | 6.73176  | 9.35730  | 2.41411E-08 | 7.48622E-07 | 9.38541  |
| Snx22         | 2.44466 | 7.12393  | 9.34416  | 2.46589E-08 | 7.60779E-07 | 9.36397  |
| Vav2          | 2.15463 | 6.46061  | 9.33394  | 2.50695E-08 | 7.69519E-07 | 9.34728  |

|               |         |          |         |             |             |         |
|---------------|---------|----------|---------|-------------|-------------|---------|
| Cdc25c        | 2.52477 | 6.80544  | 9.32929 | 2.52588E-08 | 7.71862E-07 | 9.33967 |
| Sp5           | 2.01228 | 4.54878  | 9.30992 | 2.60633E-08 | 7.88023E-07 | 9.30799 |
| Ccl7          | 2.33499 | 5.88682  | 9.28940 | 2.69452E-08 | 8.02647E-07 | 9.27436 |
| Mki67         | 2.55250 | 9.99102  | 9.23289 | 2.95376E-08 | 8.62870E-07 | 9.18150 |
| Onecut3       | 2.09295 | 4.65010  | 9.22000 | 3.01651E-08 | 8.76963E-07 | 9.16025 |
| Gng2          | 2.51666 | 7.30569  | 9.13149 | 3.48647E-08 | 9.82875E-07 | 9.01384 |
| Lats1         | 2.26979 | 8.72874  | 9.11206 | 3.59952E-08 | 1.00305E-06 | 8.98157 |
| Sgol1         | 2.37313 | 7.75504  | 9.09769 | 3.68557E-08 | 1.01073E-06 | 8.95767 |
| Cd276         | 2.40148 | 8.59387  | 9.09380 | 3.70924E-08 | 1.01346E-06 | 8.95119 |
| Cdk6          | 2.25001 | 8.36690  | 9.09330 | 3.71227E-08 | 1.01346E-06 | 8.95037 |
| C330027C09Rik | 2.53602 | 8.14717  | 9.08537 | 3.76108E-08 | 1.01988E-06 | 8.93716 |
| Tram2         | 2.24814 | 7.97903  | 9.08334 | 3.77366E-08 | 1.02100E-06 | 8.93378 |
| Stk4          | 2.94934 | 6.64982  | 9.05068 | 3.98245E-08 | 1.06793E-06 | 8.87931 |
| Peg12         | 2.88215 | 4.59727  | 9.02715 | 4.14029E-08 | 1.09715E-06 | 8.83999 |
| Gzmd          | 2.89939 | 4.89842  | 9.01157 | 4.24845E-08 | 1.11455E-06 | 8.81389 |
| Spry4         | 2.12256 | 6.51694  | 9.00900 | 4.26657E-08 | 1.11688E-06 | 8.80959 |
| Abr           | 2.41979 | 8.04580  | 8.97829 | 4.48942E-08 | 1.15765E-06 | 8.75808 |
| Dclre1b       | 2.27210 | 7.17737  | 8.97685 | 4.50011E-08 | 1.15765E-06 | 8.75567 |
| Ubxn2b        | 2.02020 | 7.01927  | 8.97446 | 4.51805E-08 | 1.15765E-06 | 8.75164 |
| Runx1         | 2.41027 | 8.93371  | 8.95033 | 4.70286E-08 | 1.18826E-06 | 8.71107 |
| Xylt2         | 2.55010 | 6.54213  | 8.94989 | 4.70627E-08 | 1.18826E-06 | 8.71034 |
| Tnfrsf10b     | 2.46582 | 7.77538  | 8.92324 | 4.91978E-08 | 1.22487E-06 | 8.66544 |
| Il18bp        | 2.04442 | 6.31734  | 8.92294 | 4.92218E-08 | 1.22487E-06 | 8.66495 |
| Mastl         | 2.09357 | 7.87193  | 8.89978 | 5.11606E-08 | 1.26243E-06 | 8.62585 |
| Map3k11       | 2.11926 | 6.65765  | 8.88915 | 5.20763E-08 | 1.27914E-06 | 8.60789 |
| Zmiz1         | 2.32331 | 9.03616  | 8.87276 | 5.35226E-08 | 1.31033E-06 | 8.58017 |
| B4galt5       | 2.37024 | 8.53122  | 8.87008 | 5.37634E-08 | 1.31356E-06 | 8.57562 |
| Arhgap10      | 2.23864 | 7.73741  | 8.85793 | 5.48675E-08 | 1.33515E-06 | 8.55505 |
| Ifi202b       | 3.13614 | 7.62310  | 8.84986 | 5.56140E-08 | 1.34783E-06 | 8.54137 |
| Ltb           | 2.10527 | 5.52030  | 8.81332 | 5.91303E-08 | 1.42171E-06 | 8.47931 |
| Pdzd9         | 2.30749 | 5.95028  | 8.79510 | 6.09689E-08 | 1.44864E-06 | 8.44830 |
| Cdca7         | 2.02539 | 7.35098  | 8.79269 | 6.12168E-08 | 1.45168E-06 | 8.44420 |
| Cyp4f18       | 2.08286 | 5.22437  | 8.77154 | 6.34349E-08 | 1.48679E-06 | 8.40816 |
| Cap1          | 2.64541 | 10.24332 | 8.75471 | 6.52608E-08 | 1.51574E-06 | 8.37943 |
| Abhd8         | 2.37312 | 6.05049  | 8.73859 | 6.70609E-08 | 1.54483E-06 | 8.35188 |
| Inhba         | 3.27559 | 8.65235  | 8.73602 | 6.73528E-08 | 1.54566E-06 | 8.34748 |
| Gsg2          | 2.04481 | 5.92256  | 8.71855 | 6.93719E-08 | 1.58480E-06 | 8.31757 |
| Panx1         | 2.07352 | 6.06395  | 8.71676 | 6.95823E-08 | 1.58480E-06 | 8.31450 |
| Plscr1        | 2.16335 | 7.90286  | 8.71465 | 6.98305E-08 | 1.58746E-06 | 8.31090 |
| Sema3e        | 2.47766 | 7.02370  | 8.65679 | 7.70286E-08 | 1.71879E-06 | 8.21154 |
| Rad51         | 2.19403 | 7.56776  | 8.65439 | 7.73428E-08 | 1.72249E-06 | 8.20742 |
| Traf1         | 2.36788 | 6.71496  | 8.61781 | 8.23102E-08 | 1.80337E-06 | 8.14437 |
| Ccdc130       | 2.39144 | 6.81455  | 8.59492 | 8.55870E-08 | 1.85108E-06 | 8.10482 |
| Dvl3          | 2.71968 | 7.50523  | 8.56245 | 9.04706E-08 | 1.92563E-06 | 8.04861 |
| Cenpe         | 2.40716 | 8.62523  | 8.56193 | 9.05514E-08 | 1.92563E-06 | 8.04770 |

|               |         |         |         |             |             |         |
|---------------|---------|---------|---------|-------------|-------------|---------|
| Hcls1         | 2.20596 | 5.75510 | 8.55771 | 9.12069E-08 | 1.93180E-06 | 8.04040 |
| Esm1          | 2.03478 | 4.39375 | 8.54702 | 9.28912E-08 | 1.95719E-06 | 8.02186 |
| Nt5e          | 2.65748 | 9.53693 | 8.54105 | 9.38465E-08 | 1.97045E-06 | 8.01149 |
| Ttll3         | 2.03263 | 6.98013 | 8.53147 | 9.54014E-08 | 1.99617E-06 | 7.99484 |
| Itgb3         | 3.17481 | 7.33314 | 8.51869 | 9.75161E-08 | 2.02988E-06 | 7.97263 |
| Grasp         | 2.44079 | 7.01752 | 8.49985 | 1.00723E-07 | 2.07521E-06 | 7.93984 |
| Zfp948        | 2.11119 | 7.17311 | 8.44482 | 1.10736E-07 | 2.22836E-06 | 7.84381 |
| Ptgs2         | 2.37211 | 9.50539 | 8.43773 | 1.12100E-07 | 2.24832E-06 | 7.83140 |
| Ocstamp       | 2.18618 | 5.20451 | 8.42929 | 1.13746E-07 | 2.26256E-06 | 7.81663 |
| Ccnf          | 2.14057 | 8.21471 | 8.42294 | 1.15000E-07 | 2.28002E-06 | 7.80552 |
| Sema3f        | 3.00923 | 8.37909 | 8.41902 | 1.15782E-07 | 2.28070E-06 | 7.79865 |
| Maf           | 2.54129 | 5.76423 | 8.41334 | 1.16924E-07 | 2.29559E-06 | 7.78870 |
| Slc6a1        | 2.03027 | 3.99897 | 8.39486 | 1.20725E-07 | 2.35113E-06 | 7.75628 |
| Gzmf          | 2.02137 | 4.68490 | 8.37949 | 1.23985E-07 | 2.39980E-06 | 7.72927 |
| Top2a         | 2.03296 | 9.96171 | 8.35119 | 1.30227E-07 | 2.48809E-06 | 7.67949 |
| Bmpr2         | 2.20846 | 9.46484 | 8.32948 | 1.35238E-07 | 2.56358E-06 | 7.64122 |
| Taf1d         | 2.04141 | 9.86326 | 8.31315 | 1.39139E-07 | 2.60124E-06 | 7.61239 |
| Ntng2         | 2.35706 | 5.86696 | 8.30917 | 1.40108E-07 | 2.61067E-06 | 7.60536 |
| Med14         | 2.05066 | 9.50285 | 8.28409 | 1.46373E-07 | 2.69033E-06 | 7.56101 |
| Mmgt2         | 2.36088 | 7.08310 | 8.26801 | 1.50545E-07 | 2.74614E-06 | 7.53252 |
| Tnfrsf11b     | 2.33025 | 5.04728 | 8.25977 | 1.52729E-07 | 2.77343E-06 | 7.51792 |
| 2900097C17Rik | 2.36708 | 7.92681 | 8.25496 | 1.54020E-07 | 2.77737E-06 | 7.50938 |
| Zfp626        | 2.01296 | 5.98106 | 8.24756 | 1.56030E-07 | 2.79559E-06 | 7.49624 |
| Peak1         | 2.39922 | 9.35839 | 8.23383 | 1.59828E-07 | 2.85097E-06 | 7.47186 |
| Gcc2          | 2.15694 | 7.41422 | 8.19537 | 1.70987E-07 | 2.99699E-06 | 7.40343 |
| Timp1         | 2.43578 | 9.63522 | 8.18443 | 1.74310E-07 | 3.02453E-06 | 7.38391 |
| Ikzf2         | 3.06770 | 6.34190 | 8.07164 | 2.12737E-07 | 3.46528E-06 | 7.18188 |
| Smad3         | 2.01808 | 9.31621 | 8.05346 | 2.19712E-07 | 3.53821E-06 | 7.14916 |
| Ect2          | 2.89002 | 8.91995 | 8.04284 | 2.23900E-07 | 3.57781E-06 | 7.13001 |
| Trpm8         | 2.07306 | 3.53872 | 8.03020 | 2.28988E-07 | 3.64873E-06 | 7.10722 |
| Bcl11b        | 2.32190 | 4.68255 | 7.95905 | 2.59975E-07 | 3.99509E-06 | 6.97849 |
| Bub1          | 2.27309 | 8.71692 | 7.94645 | 2.65902E-07 | 4.06038E-06 | 6.95562 |
| Insl6         | 2.70892 | 7.10914 | 7.94402 | 2.67059E-07 | 4.07291E-06 | 6.95121 |
| Trpv4         | 2.28558 | 7.18223 | 7.89612 | 2.91018E-07 | 4.33147E-06 | 6.86406 |
| Cpne2         | 2.12733 | 7.67930 | 7.89513 | 2.91534E-07 | 4.33147E-06 | 6.86226 |
| Ankrd1        | 2.36669 | 8.79218 | 7.89380 | 2.92235E-07 | 4.33655E-06 | 6.85982 |
| Thbs1         | 2.38818 | 9.96105 | 7.88096 | 2.99059E-07 | 4.38402E-06 | 6.83641 |
| Map1b         | 2.17104 | 9.10630 | 7.87472 | 3.02434E-07 | 4.42813E-06 | 6.82502 |
| Cabp7         | 2.08521 | 4.57308 | 7.87174 | 3.04063E-07 | 4.44660E-06 | 6.81957 |
| Plau          | 2.27504 | 8.26796 | 7.84130 | 3.21206E-07 | 4.63168E-06 | 6.76392 |
| S100g         | 2.19944 | 4.47292 | 7.84081 | 3.21488E-07 | 4.63168E-06 | 6.76303 |
| Tubb6         | 2.11183 | 8.97447 | 7.81999 | 3.33800E-07 | 4.73824E-06 | 6.72490 |
| Rrp9          | 2.04193 | 7.61429 | 7.79643 | 3.48329E-07 | 4.88711E-06 | 6.68167 |
| Mgat5         | 2.64212 | 7.75553 | 7.78065 | 3.58429E-07 | 4.97468E-06 | 6.65267 |
| E2f8          | 2.66939 | 8.35046 | 7.78024 | 3.58695E-07 | 4.97468E-06 | 6.65192 |

|               |         |         |         |             |             |         |
|---------------|---------|---------|---------|-------------|-------------|---------|
| Klrc1         | 2.20457 | 3.63330 | 7.74434 | 3.82835E-07 | 5.19997E-06 | 6.58583 |
| Vdr           | 2.19786 | 8.06625 | 7.74346 | 3.83445E-07 | 5.19997E-06 | 6.58422 |
| Olig2         | 2.69647 | 4.98194 | 7.72855 | 3.93980E-07 | 5.32225E-06 | 6.55671 |
| Melk          | 2.94603 | 7.22853 | 7.70072 | 4.14456E-07 | 5.50486E-06 | 6.50530 |
| Ccnb2         | 3.11667 | 9.59590 | 7.69743 | 4.16949E-07 | 5.52310E-06 | 6.49921 |
| Krt34         | 2.08102 | 4.55096 | 7.66525 | 4.42176E-07 | 5.76258E-06 | 6.43960 |
| Pstpip1       | 2.02293 | 7.29944 | 7.63278 | 4.69232E-07 | 6.04355E-06 | 6.37933 |
| Shcbp1        | 2.06243 | 7.76294 | 7.63170 | 4.70166E-07 | 6.04913E-06 | 6.37731 |
| Lrp5          | 2.34548 | 8.30598 | 7.62989 | 4.71727E-07 | 6.06277E-06 | 6.37395 |
| Nt5c3b        | 2.22207 | 8.85951 | 7.60112 | 4.97278E-07 | 6.29088E-06 | 6.32042 |
| Moxd1         | 2.50388 | 8.54332 | 7.56445 | 5.31963E-07 | 6.64624E-06 | 6.25199 |
| Mmp10         | 2.51634 | 7.20806 | 7.51999 | 5.77404E-07 | 7.06405E-06 | 6.16880 |
| Sp100         | 2.50528 | 7.21474 | 7.51448 | 5.83312E-07 | 7.12583E-06 | 6.15846 |
| 2610020H08Rik | 2.14646 | 5.67528 | 7.50119 | 5.97810E-07 | 7.25894E-06 | 6.13355 |
| Lrrc49        | 2.26309 | 6.50280 | 7.50041 | 5.98675E-07 | 7.26216E-06 | 6.13208 |
| Nemf          | 2.32066 | 8.45222 | 7.48621 | 6.14619E-07 | 7.38886E-06 | 6.10540 |
| Proser2       | 2.53822 | 6.45675 | 7.42732 | 6.85567E-07 | 8.04976E-06 | 5.99452 |
| Mmp9          | 2.37562 | 9.62117 | 7.41702 | 6.98829E-07 | 8.12657E-06 | 5.97508 |
| Gm20767       | 2.04638 | 4.18407 | 7.38081 | 7.47592E-07 | 8.57816E-06 | 5.90661 |
| Ccdc82        | 2.03710 | 7.17215 | 7.35516 | 7.84259E-07 | 8.87442E-06 | 5.85801 |
| Zfp81         | 2.62392 | 6.35922 | 7.34514 | 7.99101E-07 | 8.98172E-06 | 5.83898 |
| Ldb1          | 2.06550 | 9.80043 | 7.29924 | 8.70846E-07 | 9.56586E-06 | 5.75171 |
| Efna5         | 3.24979 | 7.58518 | 7.28989 | 8.86270E-07 | 9.66583E-06 | 5.73389 |
| Dusp7         | 2.01257 | 9.02781 | 7.28984 | 8.86341E-07 | 9.66583E-06 | 5.73381 |
| Apbb1ip       | 2.29681 | 7.63706 | 7.28089 | 9.01365E-07 | 9.78555E-06 | 5.71674 |
| Padi4         | 2.79924 | 7.88583 | 7.27947 | 9.03773E-07 | 9.80290E-06 | 5.71403 |
| Slc41a2       | 2.02530 | 6.52458 | 7.26035 | 9.36868E-07 | 1.00895E-05 | 5.67753 |
| Kif23         | 2.25099 | 8.82194 | 7.22166 | 1.00771E-06 | 1.05976E-05 | 5.60354 |
| Sfn           | 3.45550 | 7.41093 | 7.17550 | 1.09957E-06 | 1.12127E-05 | 5.51498 |
| Atp10a        | 2.83231 | 6.54746 | 7.17021 | 1.11064E-06 | 1.13065E-05 | 5.50481 |
| H2-Q2         | 2.36756 | 5.85351 | 7.14015 | 1.17579E-06 | 1.18106E-05 | 5.44695 |
| Hal           | 2.04654 | 6.00803 | 7.13271 | 1.19252E-06 | 1.19489E-05 | 5.43261 |
| Sfn3          | 2.35754 | 6.45777 | 7.07162 | 1.33953E-06 | 1.29706E-05 | 5.31461 |
| Etv4          | 2.01407 | 7.54970 | 7.05806 | 1.37463E-06 | 1.31577E-05 | 5.28835 |
| Depdc1a       | 2.97552 | 7.17988 | 7.02144 | 1.47432E-06 | 1.38651E-05 | 5.21728 |
| Has2          | 2.51342 | 8.62707 | 7.01862 | 1.48231E-06 | 1.39293E-05 | 5.21180 |
| Ube2l6        | 2.84963 | 6.65969 | 7.01350 | 1.49691E-06 | 1.39889E-05 | 5.20186 |
| Tslp          | 2.64231 | 8.37438 | 6.99055 | 1.56421E-06 | 1.44232E-05 | 5.15721 |
| G6pd2         | 2.04258 | 5.69904 | 6.99039 | 1.56468E-06 | 1.44232E-05 | 5.15691 |
| Rin1          | 2.02939 | 7.41593 | 6.96808 | 1.63316E-06 | 1.49180E-05 | 5.11343 |
| Ccnb1         | 2.07663 | 8.53211 | 6.96464 | 1.64398E-06 | 1.49942E-05 | 5.10673 |
| Phlda2        | 2.84794 | 8.19156 | 6.96404 | 1.64590E-06 | 1.49997E-05 | 5.10554 |
| Tmem97        | 2.46255 | 8.68307 | 6.96367 | 1.64707E-06 | 1.49997E-05 | 5.10482 |
| Ror2          | 2.15439 | 5.71353 | 6.95698 | 1.66836E-06 | 1.51673E-05 | 5.09178 |
| Bst1          | 2.35734 | 6.84276 | 6.94815 | 1.69697E-06 | 1.53272E-05 | 5.07452 |

|          |         |         |         |             |             |         |
|----------|---------|---------|---------|-------------|-------------|---------|
| Il12rb1  | 2.07429 | 6.07336 | 6.94520 | 1.70662E-06 | 1.53582E-05 | 5.06877 |
| Tnfsf10  | 2.12462 | 5.49378 | 6.90073 | 1.85934E-06 | 1.62712E-05 | 4.98178 |
| Upp1     | 2.37070 | 7.73967 | 6.89586 | 1.87692E-06 | 1.63681E-05 | 4.97222 |
| Msln     | 3.21157 | 7.48685 | 6.84793 | 2.05923E-06 | 1.75541E-05 | 4.87814 |
| Il23a    | 2.42213 | 7.86287 | 6.79062 | 2.30161E-06 | 1.92235E-05 | 4.76521 |
| Kcnn4    | 2.01903 | 8.42918 | 6.78198 | 2.34062E-06 | 1.94553E-05 | 4.74815 |
| Nos2     | 3.38926 | 6.44790 | 6.77025 | 2.39470E-06 | 1.97825E-05 | 4.72496 |
| Mxd1     | 2.35196 | 7.29222 | 6.76770 | 2.40662E-06 | 1.98673E-05 | 4.71993 |
| Tnc      | 2.78273 | 8.69423 | 6.74698 | 2.50587E-06 | 2.05186E-05 | 4.67891 |
| Ngfr     | 2.07643 | 6.93356 | 6.73061 | 2.58726E-06 | 2.09580E-05 | 4.64648 |
| Pthlh    | 2.41838 | 6.48930 | 6.69839 | 2.75552E-06 | 2.19534E-05 | 4.58254 |
| Oasl2    | 2.19736 | 8.19181 | 6.68539 | 2.82661E-06 | 2.23518E-05 | 4.55669 |
| P2ry6    | 2.56314 | 7.10792 | 6.66690 | 2.93097E-06 | 2.30926E-05 | 4.51990 |
| Scx      | 2.21106 | 6.83030 | 6.66295 | 2.95375E-06 | 2.31659E-05 | 4.51204 |
| Slc15a3  | 2.89646 | 6.81801 | 6.65259 | 3.01446E-06 | 2.35509E-05 | 4.49140 |
| Snpc5    | 2.01164 | 6.36566 | 6.61684 | 3.23399E-06 | 2.47857E-05 | 4.42007 |
| Tcf15    | 2.03529 | 5.51727 | 6.53774 | 3.78063E-06 | 2.80681E-05 | 4.26162 |
| B4galnt1 | 2.00030 | 8.21844 | 6.49602 | 4.10658E-06 | 2.99004E-05 | 4.17772 |
| Rara     | 2.76441 | 7.68741 | 6.48699 | 4.18088E-06 | 3.03321E-05 | 4.15953 |
| Slc7a5   | 2.05166 | 9.22727 | 6.42705 | 4.71069E-06 | 3.31420E-05 | 4.03850 |
| Hhip     | 2.45632 | 7.83886 | 6.42547 | 4.72558E-06 | 3.31696E-05 | 4.03530 |
| Plek2    | 2.46206 | 7.36816 | 6.40842 | 4.88913E-06 | 3.39628E-05 | 4.00079 |
| Hsf2     | 2.37737 | 6.22928 | 6.40749 | 4.89824E-06 | 3.39870E-05 | 3.99890 |
| Zmynd19  | 2.56685 | 7.59453 | 6.40499 | 4.92272E-06 | 3.41372E-05 | 3.99385 |
| Mmp12    | 3.36345 | 6.75099 | 6.38676 | 5.10541E-06 | 3.50226E-05 | 3.95689 |
| Vegfc    | 2.11973 | 6.79740 | 6.37584 | 5.21815E-06 | 3.54110E-05 | 3.93474 |
| Arhgap29 | 2.16443 | 7.62573 | 6.36769 | 5.30395E-06 | 3.58025E-05 | 3.91820 |
| Il1a     | 3.60965 | 7.61758 | 6.32793 | 5.74415E-06 | 3.80947E-05 | 3.83734 |
| Osr2     | 2.23103 | 5.98767 | 6.32127 | 5.82145E-06 | 3.84015E-05 | 3.82378 |
| Itga5    | 2.05188 | 7.70941 | 6.30971 | 5.95832E-06 | 3.91205E-05 | 3.80022 |
| Pole     | 2.21932 | 7.40300 | 6.30898 | 5.96706E-06 | 3.91520E-05 | 3.79873 |
| Ly75     | 2.78977 | 7.07523 | 6.29288 | 6.16343E-06 | 4.01187E-05 | 3.76590 |
| Ube2c    | 2.09250 | 9.57980 | 6.26736 | 6.48844E-06 | 4.16517E-05 | 3.71379 |
| Cxcl11   | 2.15140 | 5.99655 | 6.25584 | 6.64101E-06 | 4.24281E-05 | 3.69023 |
| Sh3bp1   | 2.05219 | 7.78584 | 6.23142 | 6.97667E-06 | 4.40476E-05 | 3.64024 |
| Chek1    | 2.13426 | 8.65385 | 6.23002 | 6.99641E-06 | 4.40892E-05 | 3.63737 |
| BC147527 | 2.23707 | 4.04617 | 6.22743 | 7.03305E-06 | 4.42318E-05 | 3.63208 |
| Gbx2     | 2.05758 | 4.83172 | 6.21805 | 7.16777E-06 | 4.48226E-05 | 3.61284 |
| Pla2g7   | 2.62805 | 8.44068 | 6.19343 | 7.53396E-06 | 4.64639E-05 | 3.56233 |
| Pgf      | 2.23946 | 7.26407 | 6.19200 | 7.55585E-06 | 4.65041E-05 | 3.55939 |
| Kmt2d    | 2.11017 | 7.48596 | 6.13285 | 8.51956E-06 | 5.06393E-05 | 3.43771 |
| Ibsp     | 2.11184 | 6.15128 | 6.10747 | 8.97116E-06 | 5.26442E-05 | 3.38537 |
| Mid1     | 2.72343 | 6.14571 | 6.04417 | 1.02084E-05 | 5.81078E-05 | 3.25445 |
| Glipr2   | 2.07042 | 7.62079 | 5.98967 | 1.14142E-05 | 6.30046E-05 | 3.14134 |
| Id2      | 2.14463 | 9.22902 | 5.90335 | 1.36327E-05 | 7.22814E-05 | 2.96145 |

|         |         |         |         |             |             |         |
|---------|---------|---------|---------|-------------|-------------|---------|
| Tnrc18  | 2.58063 | 7.28845 | 5.84830 | 1.52754E-05 | 7.90235E-05 | 2.84624 |
| Cd109   | 2.26403 | 6.33159 | 5.74681 | 1.88592E-05 | 9.32472E-05 | 2.63292 |
| Aim2    | 2.43551 | 4.63477 | 5.72860 | 1.95887E-05 | 9.57556E-05 | 2.59451 |
| Ctsw    | 2.21271 | 6.87105 | 5.67561 | 2.18807E-05 | 1.03897E-04 | 2.48256 |
| Mmp13   | 4.49162 | 7.64761 | 5.67297 | 2.20019E-05 | 1.04350E-04 | 2.47697 |
| Wisp1   | 2.23721 | 6.51477 | 5.63358 | 2.38938E-05 | 1.11100E-04 | 2.39354 |
| Tbc1d8b | 2.58410 | 6.70728 | 5.62693 | 2.42294E-05 | 1.12272E-04 | 2.37943 |
| Zbp1    | 2.08580 | 6.72420 | 5.56340 | 2.76902E-05 | 1.24400E-04 | 2.24443 |
| H2-T24  | 2.27723 | 6.21542 | 5.44665 | 3.54336E-05 | 1.51319E-04 | 1.99523 |
| Peg10   | 2.16409 | 5.13338 | 5.43318 | 3.64599E-05 | 1.54555E-04 | 1.96639 |
| Espn    | 2.46976 | 6.25760 | 5.42585 | 3.70315E-05 | 1.56321E-04 | 1.95067 |
| Trpm6   | 2.32912 | 6.73945 | 5.22646 | 5.66550E-05 | 2.18108E-04 | 1.52146 |
| Gjb3    | 2.56356 | 8.11727 | 5.11422 | 7.21142E-05 | 2.62458E-04 | 1.27820 |
| Cxcl10  | 2.30243 | 6.57943 | 5.05754 | 8.14974E-05 | 2.88787E-04 | 1.15496 |
