# Supplementary material for: Evidence of Antitumor and Antimetastatic Potential of Induced Pluripotent Stem Cell-Based Vaccines in Cancer Immunotherapy
Source: PubMed Central journal article supplement (PMC8702815; doi:10.3389/fmed.2021.729018), 2021-12-10
Supplement: Data_Sheet_3.pdf [file Data_Sheet_3.pdf]

**Supplemental Table 3 : Differentially expressed immune genes that were upregulated in 4T1 cells by treatment with valproic acid**

| Gene symbol | Description                                                                | Gene ID | Fold change<br>(Valproic acid /control) |
|-------------|----------------------------------------------------------------------------|---------|-----------------------------------------|
| CD74        | CD74 molecule                                                              | 972     | 2.756137                                |
| TNFRSF9     | TNF receptor superfamily member 9                                          | 3604    | 2.152303                                |
| CCL2        | C-C motif chemokine ligand 2                                               | 6347    | 2.0778043                               |
| CASP4       | caspase 4                                                                  | 837     | 1.812713                                |
| AREG        | amphiregulin                                                               | 374     | 1.7866501                               |
| IFIT2       | interferon induced protein with tetratricopeptide repeats 2                | 3433    | 1.7681799                               |
| SERPINB2    | serpin family B member 2                                                   | 5055    | 1.7294099                               |
| LY6E        | lymphocyte antigen 6 family member E                                       | 4061    | 1.7189492                               |
| PLK2        | polo like kinase 2                                                         | 10769   | 1.6721709                               |
| EGR1        | early growth response 1                                                    | 1958    | 1.6136316                               |
| DRAM1       | DNA damage regulated autophagy modulator 1                                 | 55332   | 1.6093787                               |
| KLF9        | Kruppel like factor 9                                                      | 687     | 1.6086748                               |
| IFIH1       | interferon induced with helicase C domain 1                                | 64135   | 1.5915328                               |
| UBE2L6      | ubiquitin conjugating enzyme E2 L6                                         | 9246    | 1.559597                                |
| IL15RA      | interleukin 15 receptor subunit alpha                                      | 3601    | 1.5306206                               |
| CCRL2       | C-C motif chemokine receptor like 2                                        | 9034    | 1.524512                                |
| STAT1       | signal transducer and activator of transcription 1                         | 6772    | 1.4973801                               |
| NLR5        | NLR family CARD domain containing 5                                        | 84166   | 1.4913481                               |
| ISOC1       | isochorismatase domain containing 1                                        | 51015   | 1.4899585                               |
| BST2        | bone marrow stromal cell antigen 2                                         | 684     | 1.4610225                               |
| IL15        | interleukin 15                                                             | 3600    | 1.4604695                               |
| SAMD9L      | sterile alpha motif domain containing 9 like                               | 219285  | 1.448133                                |
| HERC6       | HECT and RLD domain containing E3 ubiquitin protein ligase family member 6 | 55008   | 1.4128106                               |
| DHX58       | DExH-box helicase 58                                                       | 79132   | 1.4095724                               |
| CSF1        | colony stimulating factor 1                                                | 1435    | 1.401427                                |
| SOD2        | superoxide dismutase 2                                                     | 6648    | 1.3938667                               |
| PSMB9       | proteasome subunit beta 9                                                  | 5698    | 1.3776621                               |
| SLC2A6      | solute carrier family 2 member 6                                           | 11182   | 1.3619148                               |
| RNF213      | ring finger protein 213                                                    | 57674   | 1.3537916                               |
| IL7         | interleukin 7                                                              | 3574    | 1.3391039                               |
| TUBB2A      | tubulin beta 2A class IIa                                                  | 7280    | 1.331755                                |
| TDRD7       | tudor domain containing 7                                                  | 23424   | 1.3295585                               |
| ATP2B1      | ATPase plasma membrane Ca <sup>2+</sup> transporting 1                     | 490     | 1.3081365                               |
| CCL20       | C-C motif chemokine ligand 20                                              | 6364    | 1.307062                                |
| CD274       | CD274 molecule                                                             | 29126   | 1.2911943                               |
| CEBPD       | CCAAT/enhancer binding protein delta                                       | 1052    | 1.2831194                               |
| ZBTB10      | zinc finger and BTB domain containing 10                                   | 65986   | 1.2745908                               |
| IRS2        | insulin receptor substrate 2                                               | 8660    | 1.2700346                               |
| NCOA7       | nuclear receptor coactivator 7                                             | 135112  | 1.2286383                               |
| REL         | REL proto-oncogene, NF- $\kappa$ B subunit                                 | 5966    | 1.2227736                               |
| CCL7        | C-C motif chemokine ligand 7                                               | 6354    | 1.1728142                               |
| IL10RA      | interleukin 10 receptor subunit alpha                                      | 3587    | 1.1703566                               |
| SP110       | SP110 nuclear body protein                                                 | 3431    | 1.1379845                               |
| MSC         | musculin                                                                   | 9242    | 1.1052907                               |
