# Supplementary material for: Evidence of Antitumor and Antimetastatic Potential of Induced Pluripotent Stem Cell-Based Vaccines in Cancer Immunotherapy
Source: PubMed Central journal article supplement (PMC8702815; doi:10.3389/fmed.2021.729018), 2021-12-10
Supplement: Data_Sheet_4.pdf [file Data_Sheet_4.pdf]

**Supplementary Table 4 : Genes that were differentially expressed between vaccinated and control mice that developed 4T1-derived tumors.**

| Gene symbol   | Description                                                         | FC vaccin/CT 4T1 | Ranking p-values |
|---------------|---------------------------------------------------------------------|------------------|------------------|
| Cxcl13        | chemokine (C-X-C motif) ligand 13                                   | 8,877            | 5.1787803E-5     |
| Gm17482       | predicted gene, 17482 [Source:MGI Symbol;Acc:MGI:4937116]           | 3,117            | 1.3509862E-6     |
| Mir675        | microRNA 675; H19, imprinted maternally expressed transcript        | 2,667            | 1.8913806E-5     |
| Clec4a1       | C-type lectin domain family 4, member a1                            | 2,235            | 1.6932361E-4     |
| Fxyd1         | FXD domain-containing ion transport regulator 1                     | 2,042            | 2.6119065E-5     |
| Il20rb        | interleukin 20 receptor beta                                        | 2,014            | 3.3324326E-5     |
| Sh2d4a        | SH2 domain containing 4A                                            | 1,945            | 5.439971E-4      |
| Egln3         | EGL nine homolog 3                                                  | 1,939            | 4.6158695E-4     |
| Serpinb2      | serine (or cysteine) peptidase inhibitor, clade B, member 2         | 1,886            | 3.449518E-4      |
| Clec12a       | C-type lectin domain family 12, member a                            | 1,840            | 0.0011415834     |
| Lmo7          | LIM domain only 7                                                   | 1,828            | 1.6707196E-4     |
| Vps33b        | vacuolar protein sorting 33B (yeast)                                | 1,828            | 3.62965E-4       |
| Pmp22         | peripheral myelin protein 22                                        | 1,815            | 1.1618481E-4     |
| Ghr           | growth hormone receptor                                             | 1,809            | 7.3583715E-4     |
| Ly96          | lymphocyte antigen 96                                               | 1,759            | 7.488967E-4      |
| Cldn9         | claudin 9                                                           | 1,747            | 2.193101E-4      |
| 9230104L09Rik | RIKEN cDNA 9230104L09 gene                                          | 1,741            | 2.3011799E-4     |
| Ccl22         | chemokine (C-C motif) ligand 22                                     | 1,729            | 4.0664684E-4     |
| Ttl1          | tubulin tyrosine ligase-like 1                                      | 1,717            | 8.475187E-4      |
| Naf1          | nuclear assembly factor 1 homolog                                   | 1,711            | 6.4351974E-4     |
| Enpp2         | ectonucleotide pyrophosphatase/phosphodiesterase 2                  | 1,699            | 6.5387733E-4     |
| Tc2n          | tandem C2 domains, nuclear                                          | 1,699            | 0.0012348014     |
| Slc6a8        | solute carrier family 6 (neurotransmitter transporter, creatine), r | 1,693            | 8.2500227E-4     |
| Shroom3       | shroom family member 3                                              | 1,688            | 8.290552E-4      |
| Zfp595        | zinc finger protein 595                                             | 1,688            | 6.4351974E-4     |
| Sod3          | superoxide dismutase 3, extracellular                               | 1,676            | 4.3952087E-4     |
| Cd46          | CD46 antigen, complement regulatory protein                         | 1,670            | 6.642349E-4      |
| Cd72          | CD72 antigen                                                        | 1,670            | 0.0017567324     |
| Pid1          | phosphotyrosine interaction domain containing 1                     | 1,670            | 0.0011983248     |
| Psmg1         | proteasome (prosome, macropain) assembly chaperone 1                | 1,664            | 0.0011478879     |
| Rnf223        | ring finger 223                                                     | 1,664            | 6.421688E-4      |
| Cd300e        | CD300e antigen                                                      | 1,641            | 0.0011577952     |
| Csf2ra        | colony stimulating factor 2 receptor, alpha                         | 1,641            | 0.002091777      |
| Hnmt          | histamine N-methyltransferase                                       | 1,641            | 0.0011888678     |
| Cpa3          | carboxypeptidase A3, mast cell                                      | 1,630            | 0.0023011798     |
| Olfml2b       | olfactomedin-like 2B                                                | 1,625            | 0.0013100064     |
| Rassf9        | Ras association (RalGDS/AF-6) domain family (N-terminal) memb       | 1,625            | 0.001398721      |
| Bin2          | bridging integrator 2                                               | 1,619            | 0.0028267135     |
| Ms4a14        | PREDICTED: membrane-spanning 4-domains, subfamily A, mem            | 1,619            | 0.0020715122     |
| Olf384        | olfactory receptor 384                                              | 1,613            | 7.7321444E-4     |
| Hormad2       | HORMA domain containing 2                                           | 1,608            | 0.0018985859     |
| Gfra2         | glial cell line derived neurotrophic factor family receptor alpha 2 | 1,597            | 0.0012388544     |
| Blk           | B lymphoid kinase                                                   | 1,586            | 9.051608E-4      |
| Ms4a7         | membrane-spanning 4-domains, subfamily A, member 7                  | 1,569            | 0.0021237503     |
| Smpd4         | sphingomyelin phosphodiesterase 4                                   | 1,564            | 0.0023291004     |
| Ccr2          | chemokine (C-C motif) receptor 2                                    | 1,553            | 0.0021359092     |
| Hhip          | Hedgehog-interacting protein                                        | 1,553            | 0.0018076196     |
| Ctse          | cathepsin E                                                         | 1,548            | 0.0041119517     |
| Gm2573        | PREDICTED: predicted gene 2573 (Gm2573)                             | 1,542            | 0.003948032      |

|               |                                                              |       |              |
|---------------|--------------------------------------------------------------|-------|--------------|
| Rasl12        | RAS-like, family 12                                          | 1,542 | 0.0016527065 |
| Smtnl1        | smoothelin-like 1                                            | 1,542 | 0.0025668738 |
| Gm5595        | predicted gene 5595                                          | 1,537 | 0.002425921  |
| Pbx4          | pre B cell leukemia homeobox 4                               | 1,537 | 0.0018666127 |
| Etv3          | ets variant 3                                                | 1,532 | 0.002837071  |
| Fam49a        | family with sequence similarity 49, member A                 | 1,532 | 0.0028897594 |
| Msmg          | microseminoprotein, prostate associated                      | 1,532 | 0.0013523372 |
| Cdon          | cell adhesion molecule-related/down-regulated by oncogenes   | 1,526 | 0.0024592453 |
| Atp13a5       | ATPase type 13A5                                             | 1,521 | 0.002064307  |
| Inmt          | indolethylamine N-methyltransferase                          | 1,521 | 0.0027361973 |
| Gm1818        | predicted gene 1818 [Source:MGI Symbol;Acc:MGI:3037676]      | 1,516 | 0.0032720887 |
| Nupl2         | nucleoporin like 2                                           | 1,516 | 0.004172296  |
| Pgr15l        | G protein-coupled receptor 15-like                           | 1,516 | 0.0024200666 |
| Trp53i11      | transformation related protein 53 inducible protein 11       | 1,516 | 0.004660002  |
| Aldh2         | aldehyde dehydrogenase 2, mitochondrial                      | 1,510 | 0.0034625777 |
| Txnrd3        | thioredoxin reductase 3                                      | 1,510 | 0.0027334956 |
| Aim2          | absent in melanoma 2                                         | 1,510 | 0.002627218  |
| Fhit          | fragile histidine triad gene                                 | 1,510 | 0.0038422048 |
| Entpd5        | ectonucleoside triphosphate diphosphohydrolase 5             | 1,505 | 0.0027798794 |
| Gjb4          | gap junction protein, beta 4                                 | 1,505 | 0.0046388363 |
| Ndufa4l2      | NADH dehydrogenase (ubiquinone) 1 alpha subcomplex, 4-like 2 | 1,505 | 0.0017959111 |
| Olfir822      | olfactory receptor 822                                       | 1,505 | 0.0020602539 |
| Pou4f1        | POU domain, class 4, transcription factor 1                  | 1,500 | 0.004528956  |
| Syt13         | synaptotagmin XIII                                           | 1,500 | 0.0029388454 |
| Dpep1         | dipeptidase 1 (renal)                                        | 1,495 | 0.0030883546 |
| Olfir1258     | olfactory receptor 1258                                      | 1,495 | 0.0026402774 |
| Fbln5         | fibulin 5                                                    | 1,490 | 0.0046690083 |
| Krt14         | keratin 14                                                   | 1,490 | 0.002484914  |
| Olfir452      | olfactory receptor 452                                       | 1,490 | 0.003948032  |
| Tuft1         | tuftelin 1                                                   | 1,490 | 0.0048991265 |
| Ncoa7         | nuclear receptor coactivator 7                               | 1,485 | 0.003563001  |
| Nipal3        | NIPA-like domain containing 3                                | 1,485 | 0.004543367  |
| Mest          | mesoderm specific transcript                                 | 1,479 | 0.0041196076 |
| Mtfr2         | mitochondrial fission regulator 2                            | 1,474 | 0.0044375393 |
| Ssx2ip        | synovial sarcoma, X breakpoint 2 interacting protein         | 1,474 | 0.0041115014 |
| Stard3        | START domain containing 3                                    | 1,474 | 0.0044524004 |
| Wasf1         | WAS protein family, member 1                                 | 1,474 | 0.0032923534 |
| Ica1          | islet cell autoantigen 1                                     | 1,469 | 0.0048032063 |
| Nmrk1         | nicotinamide riboside kinase 1                               | 1,469 | 0.0043871026 |
| Sord          | sorbitol dehydrogenase                                       | 1,469 | 0.0047469153 |
| Kdm1b         | lysine (K)-specific demethylase 1B                           | 1,464 | 0.0040673693 |
| Slx4ip        | SLX4 interacting protein                                     | 1,464 | 0.0049171397 |
| Klra17        | killer cell lectin-like receptor, subfamily A, member 17     | 1,459 | 0.0037521392 |
| Smr2          | submaxillary gland androgen regulated protein 2              | 1,459 | 0.0045280554 |
| Pigw          | phosphatidylinositol glycan anchor biosynthesis, class W     | 1,454 | 0.0044258307 |
| Ano2          | anoctamin 2                                                  | 1,444 | 0.0044839233 |
| Klk1b11       | kallikrein 1-related peptidase b11                           | 1,444 | 0.004620823  |
| Ppp1r3f       | protein phosphatase 1, regulatory (inhibitor) subunit 3F     | 1,444 | 0.0031455462 |
| 1700011H14Rik | RIKEN cDNA 1700011H14 gene                                   | 1,439 | 0.004207872  |
